# Supplementary material for: BRAF inhibitor resistance of melanoma cells triggers increased susceptibility to natural killer cell-mediated lysis
Source: HighWire-hosted journal article supplement (doi:10.1136/jitc-2019-000275), 2020-09-01
Supplement: jitc-2019-000275supp003_data_supplement.pdf [file jitc-2019-000275supp003_data_supplement.pdf]

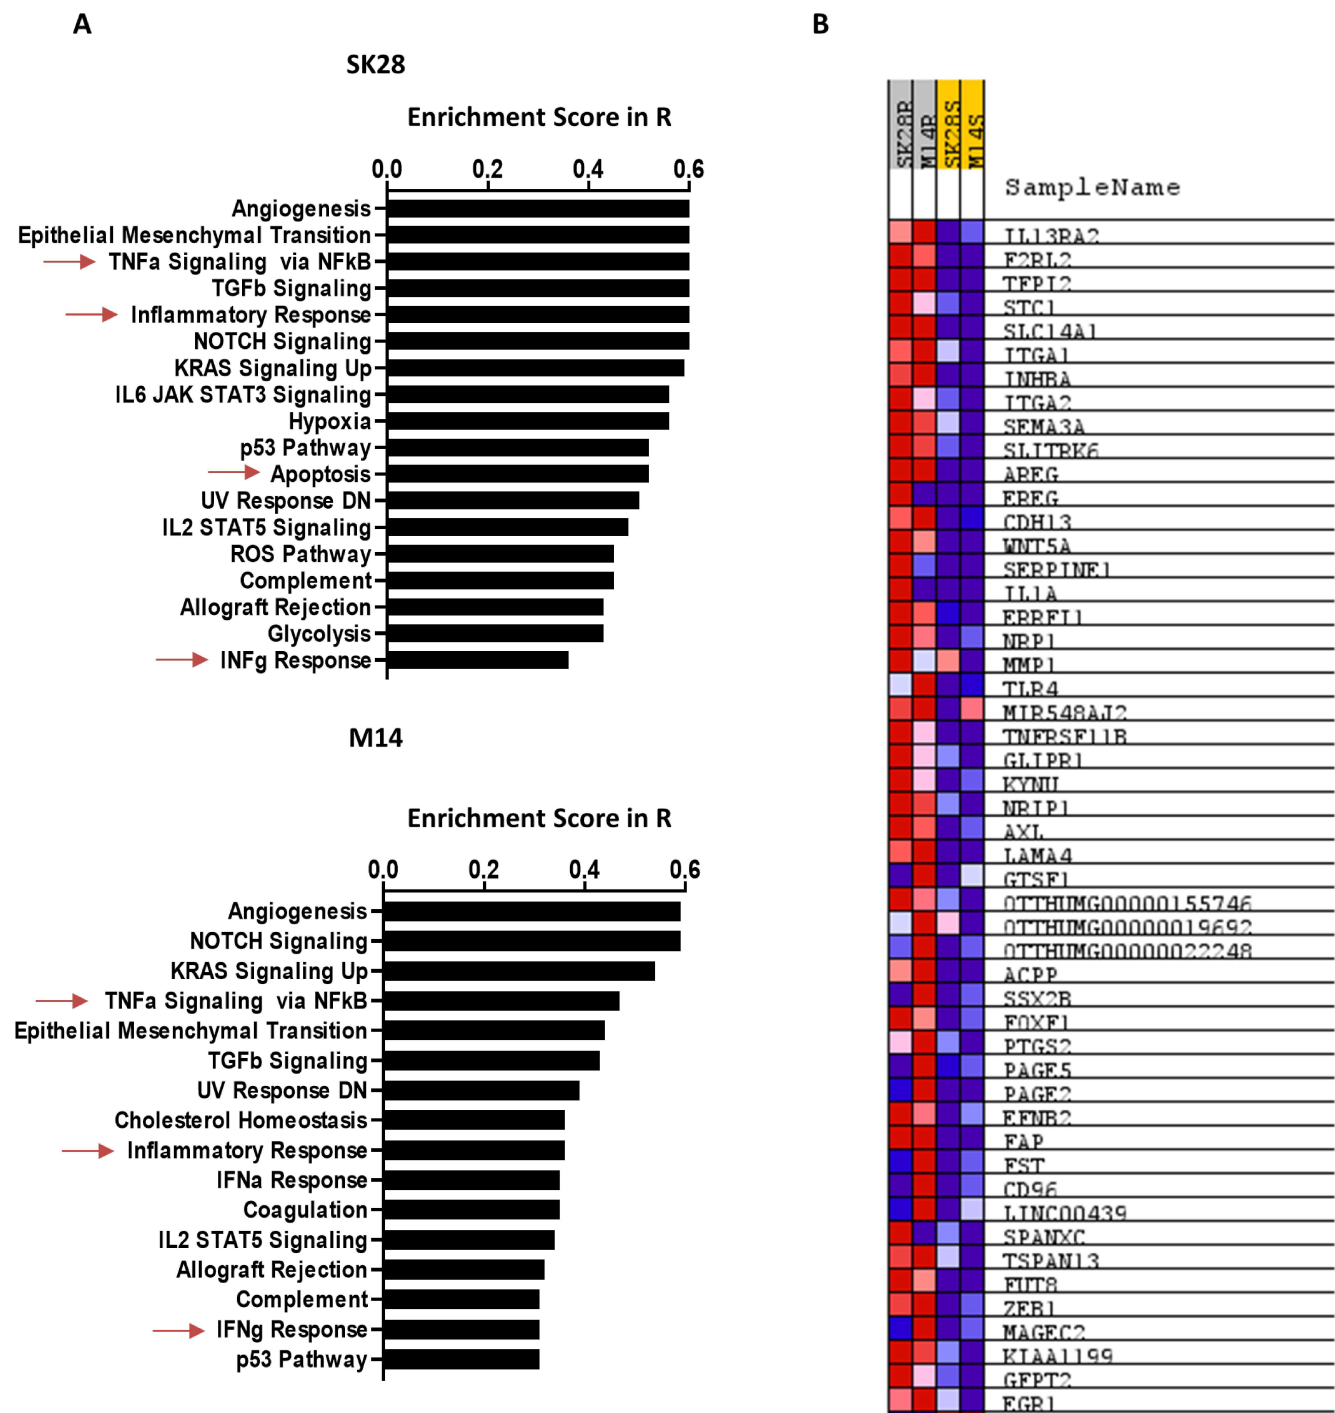

**Additional file 3: Figure S1: Pathways enriched in resistant cells compare to sensitive cells.** Gene set enrichment analysis in transcription analysis of R versus S cells. (A) Activating pathways in R cells. (B) Heat Map of the top 50 features for each phenotype in SK28 S vs R and M14 S vs R cells.
