# Supplementary figures and images for: BRAF inhibitor resistance of melanoma cells triggers increased susceptibility to natural killer cell-mediated lysis
Source: HighWire-hosted journal article supplement (doi:10.1136/jitc-2019-000275), 2020-09-01

Apoptosis

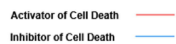

Apoptosis

-4 4 ☐ filtered out

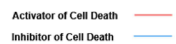

Supplement: jitc-2019-000275supp006_data_supplement.pdf [file jitc-2019-000275supp006_data_supplement.pdf]
